# Supplementary material for: Relative Efficacy of Different Exercises for Pain, Function, Performance and Quality of Life in Knee and Hip Osteoarthritis: Systematic Review and Network Meta-Analysis
Source: PubMed Central journal article supplement (PMC6459784; doi:10.1007/s40279-019-01082-0), 2019-03-04
Supplement: 40279_2019_1082_MOESM1_ESM.pdf [file 40279_2019_1082_MOESM1_ESM.pdf]

**Article title:**

Relative efficacy of different exercises for pain, function, performance and quality of life in knee and hip osteoarthritis: Systematic review and Network meta-analysis

**Journal name:**

Sports Medicine

**Authors:**

Siew-Li Goh, Monica SM Persson, Joanne Stocks, Yunfei Hou, Nicky J Welton, Jianhao Lin, Michelle C Hall, Michael Doherty, Weiya Zhang

**Affiliation and email address of corresponding author:**

Prof Weiya Zhang,

Arthritis Research UK Pain Centre, Academic Rheumatology,

Email: [Weiya.Zhang@nottingham.ac.uk](mailto:Weiya.Zhang@nottingham.ac.uk)

## Appendix 1: Medline Search Strategy

1. exercise/ or physical conditioning, human/
2. Circuit-Based Exercise/
3. exercise therapy/ or motion therapy, continuous passive/ or muscle stretching exercises/ or plyometric exercise/ or resistance training/ or hydrotherapy/ or rehabilitation/ or "activities of daily living"/ or dance therapy/
4. muscle strength/ or physical endurance/ or anaerobic threshold/ or exercise tolerance/ or physical fitness/ or postural balance/ or posture/ or psychomotor performance/ or "range of motion, articular"/
5. Pliability/
6. movement/ or motor activity/ or exercise/
7. Physical Exertion/
8. Mind-Body Therapies/
9. running/ or jogging/ or swimming/ or walking/
10. Isometric Contraction/
11. exercise movement techniques/ or breathing exercises/ or qigong/ or tai ji/ or yoga/ or pilates
12. propriocepti\$.ab,ti.
13. balanc\$.ab,ti.
14. aqua\$.ab,ti.
15. cycl\$.ab,ti.
16. aerobic.ab,ti.
17. strength\$.ab,ti.
18. (tai-ji or taiji or taijiquan or tai ji quan or tai chi or taichi or t ai chi or t'ai chi or tai chi chuan).ab,ti.
19. (qigong or qi gong or chi kung or chikung or ch i kung or ch'i kung).ab,ti.
20. therap\$.ab,ti.
21. physiotherap\$.ab,ti.
22. train\$.ab,ti.
23. neuromuscular training.ab,ti.
24. treadmill.ab,ti.
25. 1 or 2 or 3 or 4 or 5 or 6 or 7 or 8 or 9 or 10 or 11 or 12 or 13 or 14 or 15 or 16 or 17 or 18 or 19 or 20 or 21 or 22 or 23 or 24
26. Osteoarthritis, Hip/ or Osteoarthritis, Knee/
27. coxarthriti\$.mp.
28. coxarthr\$.ab,ti.
29. gonarthr\$.ab,ti.
30. (knee\$ adj3 pain).ab,ti.
31. (hip adj3 pain).ab,ti.
32. osteoarthr\$.ab,ti.
33. degenerative joint disease?.ab,ti.
34. osteoarthritis/
35. (Osteoarthriti\$ or OA or osteo arthriti\$ or osteoarthros\$ or osteo arthros\$ or arthropath\$ or arthrosis or arthroses).ti,ab.
36. Hip Joint/
37. Hip/
38. hip\$.ab,ti.
39. Knee/

40. knee\$.ab,ti.  
41. knee joint/ or patellofemoral joint/  
42. 26 or 27 or 28 or 29 or 30 or 31  
43. 32 or 33 or 34 or 35  
44. 36 or 37 or 38 or 39 or 40 or 41  
45. 43 and 44  
46. 42 or 45  
47. randomized controlled trial.pt.  
48. controlled clinical trial.pt.  
49. (placebo or (standard adj3 care)).ab.  
50. clinical trials as topic.sh.  
51. random\$.ab,ti.  
52. trial\$.ab,ti.  
53. RCT.ab,ti.  
54. 47 or 48 or 49 or 50 or 51 or 52 or 53  
55. limit 54 to humans  
56. 25 and 46 and 55

## Appendix 2: Bayesian codes

### a. Arm-based data

```
#Random effect
#multi-arm (include 3 and 4 arms)
# Random effects model for multi-arm trials, continuous outcome
# SMD

model{
for(i in 1:ns){
  w[i,1] <- 0
  delta[i,1] <- 0
  mu[i] ~ dnorm(0,.0001) # vague priors for 24 trial baselines
  for (k in 1:na[i]) {
    var[i,k] <- pow(se[i,k],2)
    prec[i,k] <- 1/var[i,k] # set precisions
    y[i,k] ~ dnorm(phi[i,k], prec[i,k]) # normal likelihood
    phi[i,k] <- theta[i,k] * Pooled.sd[i]
    theta[i,k] <- mu[i] + delta[i,k]
# deviance arm k, study i
    dev[i,k] <- (y[i,k]-phi[i,k])*(y[i,k]-phi[i,k])/var[i,k]
  }
  for (k in 2:na[i]){
# distributions for trial-specific SMD
    delta[i,k] ~ dnorm(md[i,k], taud[i,k])
    md[i,k] <- (d[t[i,k]] - d[t[i,1]]) + sw[i,k]
#precision of diff in means distributions
    taud[i,k] <- tau *2*(k-1)/k
#adjustment, multi-arm RCTs
    w[i,k] <- delta[i,k] - d[t[i,k]] + d[t[i,1]]
# cumulative adjustment for multi-arm trials
    sw[i,k] <-sum(w[i,1:k-1])/(k-1)
  }
  resdev[i] <- sum(dev[i, 1:na[i]]) # residual deviance for study i
}
d[1]<-0

for (k in 2:nt){d[k] ~ dnorm(0,.0001) } # vague priors for basic parameters
sd.d ~ dunif(0,10) # vague prior for RE st dev
var.d <- pow(sd.d,2)
tau <- 1/var.d

# overall residual deviance
totresdev <- sum(resdev[])
# all pairwise differences
for (c in 1:(nt-1)) { for (k in (c+1):nt) {pwdiff[c,k] <- (d[k]-d[c]) } }

for (k in 1:nt) {
```

```

# assumes events are "good"
rk[k] <- nt+1-rank(d[,k])
best[k] <- equals(rk[k],1) #calculate probability that treat k is best
}
}

```

## b. Arm-based and trial-based data

```

#Random effect
#multi-arm (include 3 and 4 arms)
# Random effects model for multi-arm trials, continuous outcome
# SMD

model{
for(i in 1:ns.a){ #ARM-LEVEL DATA
  w[i,1] <- 0
  delta[i,1] <- 0
  mu[i] ~ dnorm(0,.0001) # vague priors for trial baselines
  for (k in 1:na[i]) {
    var[i,k] <- pow(se[i,k],2)
    prec[i,k] <- 1/var[i,k] # set precisions
    y[i,k] ~ dnorm(phi[i,k], prec[i,k]) # normal likelihood
    phi[i,k] <- theta[i,k] * Pooled.sd[i]
    theta[i,k] <- mu[i] + delta[i,k]
# deviance arm k, study i
    dev[i,k] <- (y[i,k]-phi[i,k])*(y[i,k]-phi[i,k])/var[i,k]
  }
  for (k in 2:na[i]){
# distributions for trial-specific SMD
    delta[i,k] ~ dnorm(md[i,k], taud[i,k])
    md[i,k] <- (d[t[i,k]] - d[t[i,1]]) + sw[i,k]
#precision of diff in means distributions
    taud[i,k] <- tau *2*(k-1)/k
#adjustment, multi-arm RCTs
    w[i,k] <- delta[i,k] - d[t[i,k]] + d[t[i,1]]
# cumulative adjustment for multi-arm trials
    sw[i,k] <-sum(w[i,1:k-1])/(k-1)
  }
  resdev.a[i] <- sum(dev[i, 1:na[i]]) # residual deviance for study i
}

for(i in 1:ns.t2){ #TRIAL-LEVEL DATA, 2-arm trials
  y.t[i,2] ~ dnorm(phi.t[i,2], prec.t[i,2]) # normal likelihood
# deviance arm k, study i
  resdev.t[i] <- (y.t[i,2]-phi.t[i,2])*(y.t[i,2]-phi.t[i,2])*prec.t[i,2]
}

```

```

}

for(i in (ns.t2+1):(ns.t2+ns.t3)) { #TRIAL-LEVEL DATA: 3-ARM TRIALS
  for(k in 1:(na.t[i]-1)) { # set variance-covariance matrix
    for(j in 1:(na.t[i]-1)) {
      Sigma[i,j,k] <- V[i]*(1-equals(j,k)) + var.t[i,(k+1)]*equals(j,k)
    }
  }
  Omega[i,1:(na.t[i]-1),1:(na.t[i]-1)] <- inverse(Sigma[i,,]) #Precision
# multivariate normal likelihood for 3-arm trials
y.t[i,2:na.t[i]] ~ dnorm(phi.t[i,2:na.t[i]],Omega[i,1:(na.t[i]-1),1:(na.t[i]-1)])

#Deviance contribution for trial i
  for(k in 1:(na.t[i]-1)){ # multiply vector & matrix
    ydiff[i,k]<- y.t[i,(k+1)] - phi.t[i,(k+1)]
    z[i,k]<- inprod2(Omega[i,k,1:(na.t[i]-1)], ydiff[i,1:(na.t[i]-1)])
  }
  resdev.t[i]<- inprod2(ydiff[i,1:(na.t[i]-1)], z[i,1:(na.t[i]-1)])
}

for(i in 1:(ns.t2+ns.t3)){ #TRIAL LEVEL DATA: RANDOM EFFECTS MODEL
  w.t[i,1] <- 0
  for(k in 2:na.t[i]) {
    var.t[i,k] <- pow(se.t[i,k],2)
    prec.t[i,k] <- 1/var.t[i,k] # set precisions
    phi.t[i,k] <- delta.t[i,k] * Pooled.sd.t[i]
# distributions for trial-specific SMD
    delta.t[i,k] ~ dnorm(md.t[i,k], tau.d.t[i,k])
    md.t[i,k] <- (d[t.t[i,k]] - d[t.t[i,1]]) + sw.t[i,k]
#precision of diff in means distributions
    tau.d.t[i,k] <- tau *2*(k-1)/k
#adjustment, multi-arm RCTs
    w.t[i,k] <- delta.t[i,k] - d[t.t[i,k]] + d[t.t[i,1]]
# cumulative adjustment for multi-arm trials
    sw.t[i,k] <-sum(w.t[i,1:k-1])/(k-1)
  }
}

d[1]<-0
for(k in 2:nt){d[k] ~ dnorm(0,.0001) } # vague priors for basic parameters
sd.d ~ dunif(0,10) # vague prior for RE st dev
var.d <- pow(sd.d,2)
tau <- 1/var.d
# overall residual deviance
totresdev.a <- sum(resdev.a[])
totresdev.t<-sum(resdev.t[])

# all pairwise differences
for(c in 1:(nt-1)) { for(k in (c+1):nt) {pwdiff[c,k] <- (d[k]-d[c]) } }
for(k in 1:nt) {

```

```
# assumes events are "good"
rk[k] <- nt+1-rank(d[,k])
best[k] <- equals(rk[k],1) #calculate probability that treat k is best
}

for (c in 1:(nt-1)) {                                     #all possible pair-wise comparison
  for (k in (c+1):nt) {
    SMD[c,k] <- (d[k]-d[c])
  }
}
}
```

### Appendix 3: Funnel plot for pain, function, performance and quality of life

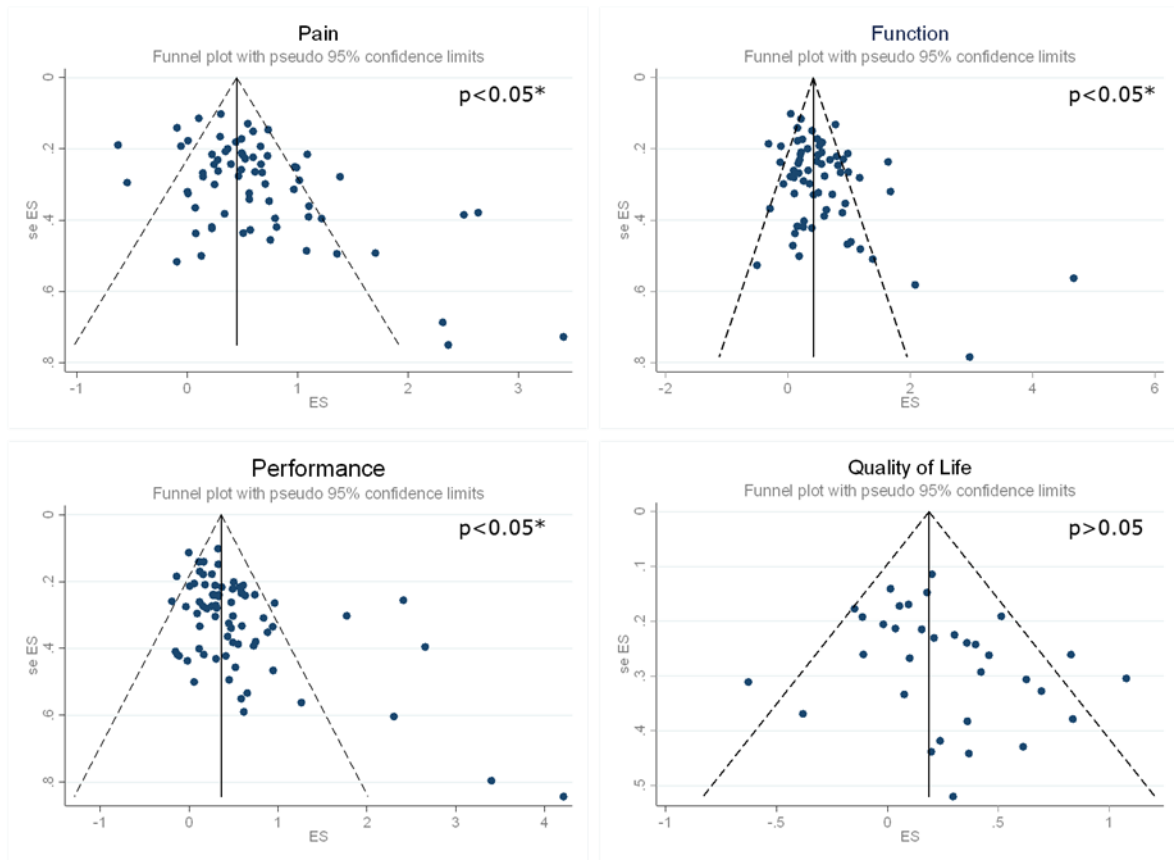

Plot to assess the bias/symmetrical distribution in the evidence of direct comparison between different exercises and usual care.

\* Egger's test suggestive of publication bias when  $p < 0.05$ .



**Appendix 4: Median ranking (95% credibility interval) of each exercise for pain, function, performance and quality of life outcomes**

|                    | <b>Pain</b> | <b>Function</b> | <b>Performance</b> | <b>Quality of Life</b> |
|--------------------|-------------|-----------------|--------------------|------------------------|
| <b>Aerobic</b>     | 1 (1, 3)    | 4 (1, 5)        | 1 (1, 3)           | 2 (1, 6)               |
| <b>Mind-body</b>   | 2 (1, 4)    | 2 (1, 5)        | 4 (1, 5)           | 3 (1, 6)               |
| <b>Strength</b>    | 3 (2, 5)    | 2 (1, 4)        | 4 (2, 5)           | 3 (1, 5)               |
| <b>Flex/Skills</b> | 4 (2, 5)    | 3 (1, 5)        | 2 (1, 5)           | 2 (1, 6)               |
| <b>Mixed</b>       | 5 (3, 5)    | 4 (3, 5)        | 4 (2, 5)           | 4 (2, 5)               |
| <b>Usual care</b>  | 6 (6, 6)    | 6 (6, 6)        | 6 (6, 6)           | 6 (5, 6)               |

1= First; 2= Second; 3= Third; 4= Fourth, 5= Fifth, 6= Sixth.

The highest ranking is the best (i.e. if there is no median ranking of 1<sup>st</sup>, the 2<sup>nd</sup> ranking will be the best)

**Appendix 5: Estimates from direct and indirect comparison for each exercise types relative to usual care control**

|                        | Effect size (95% confidence interval) |                      |
|------------------------|---------------------------------------|----------------------|
|                        | Direct                                | Indirect             |
| <b>Pain</b>            |                                       |                      |
| Aerobic                | -0.82 (-1.42, -0.21)                  | -1.15 (-1.62, -0.68) |
| Flex/skills            | -0.81 (-1.39, -0.23)                  | -0.47 (-0.83, -0.10) |
| Mind-body              | -0.81 (-1.35, -0.27)                  | -1.47 (-2.12, -0.81) |
| Mixed                  | -0.50 (-0.70, -0.29)                  | -0.15 (-0.57, 0.28)  |
| Strength               | -0.60 (-0.84, -0.36)                  | -0.84 (-1.28, -0.39) |
| <b>Function</b>        |                                       |                      |
| Aerobic                | -0.50 (-1.10, 0.11)                   | -0.60 (-1.16, -0.04) |
| Flex/skills            | -0.85 (-1.17, -0.07)                  | -0.57 (-0.95, -0.19) |
| Mind-body              | -0.67 (-1.27, -0.06)                  | -0.96 (-1.69, -0.22) |
| Mixed                  | -0.35 (-0.59, -0.11)                  | -0.49 (-0.94, -0.05) |
| Strength               | -0.74 (-1.01, -0.47)                  | -0.50 (-0.99, -0.01) |
| <b>Performance</b>     |                                       |                      |
| Aerobic                | -0.86 (-1.47, -0.26)                  | -0.94 (-1.36, -0.52) |
| Flex/skills            | -0.59 (-1.12, -0.05)                  | -0.63 (-0.95, -0.31) |
| Mind-body              | -0.54 (-1.05, -0.03)                  | -0.36 (-1.11, 0.39)  |
| Mixed                  | -0.40 (-0.60, -0.21)                  | -0.50 (-0.87, -0.14) |
| Strength               | -0.52 (-0.73, -0.30)                  | -0.43 (-0.81, -0.05) |
| <b>Quality of Life</b> |                                       |                      |
| Aerobic                | -0.18 (-0.32, -0.04)                  | -                    |
| Flex/skills            | -                                     | -0.31 (-0.63, 0.00)  |
| Mind-body              | -0.22 (-0.59, 0.15)                   | -0.18 (-0.77, 0.41)  |
| Mixed                  | -0.18 (-0.34, -0.03)                  | -0.19 (-0.61, 0.23)  |
| Strength               | -0.23 (-0.43, -0.02)                  | -0.32 (-0.79, 0.16)  |

Overlapping of 95% confidence interval indicates no disagreement between direct and indirect evidence

## Appendix 6: Risk of bias

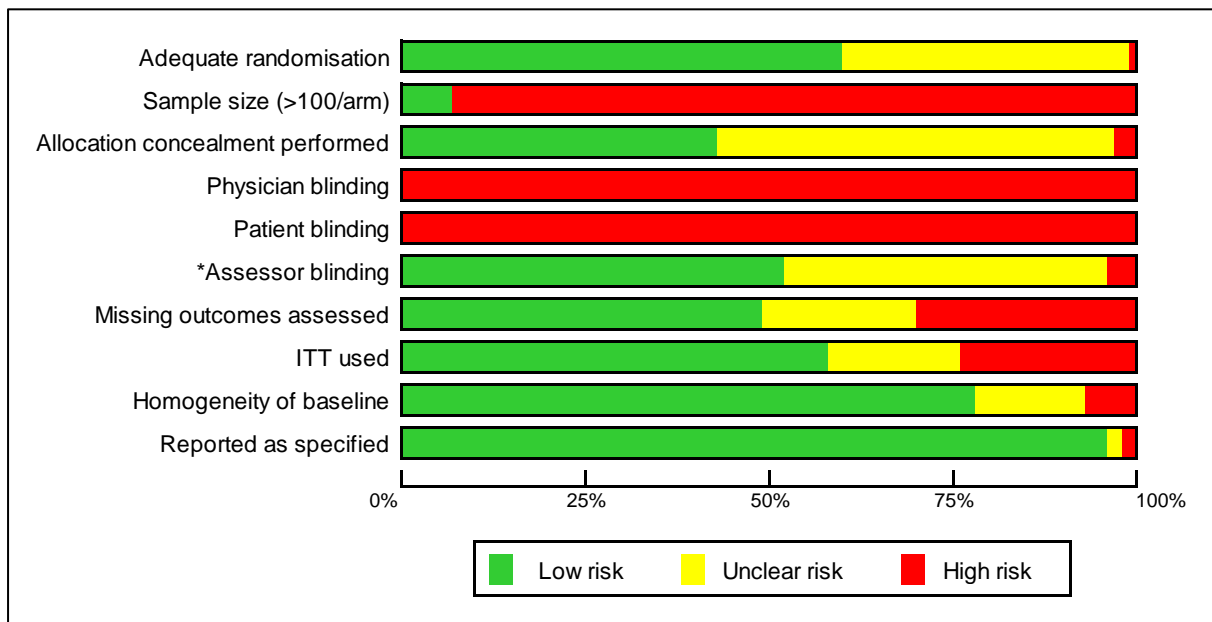

\* Data is for studies with objective performance test since assessor blinding is not possible for self-reported outcomes  
ITT= intention to treat analysis





| Study               | Adequate randomization | >100 per group | Concealed Allocation | Physician Blind | Patient Blind | Assessor Blind | Missing Outcome Assess | Intention-to-treat Use | Homogenous Group | Reported as Pre-specified | Country        |
|---------------------|------------------------|----------------|----------------------|-----------------|---------------|----------------|------------------------|------------------------|------------------|---------------------------|----------------|
| Lund 2008           | Unclear                | No             | Yes                  | No              | No            | Yes            | Yes                    | Yes                    | Yes              | Yes                       | Denmark        |
| Messier 1997        | Unclear                | No             | Unclear              | No              | No            | Unclear        | Unclear                | Unclear                | Yes              | Yes                       | United States  |
| Moghadam 2017       | Unclear                | No             | Unclear              | No              | No            | Unclear        | No                     | Unclear                | Yes              | Unclear                   | Azerbaijan     |
| Munukka 2016        | Yes                    | No             | Unclear              | No              | No            | Yes            | Yes                    | Yes                    | Yes              | Yes                       | Finland        |
| Oida 2008           | Yes                    | No             | Unclear              | No              | No            | Unclear        | Unclear                | No                     | No               | Yes                       | Japan          |
| Oosting 2012        | Unclear                | No             | Yes                  | No              | No            | Yes            | No                     | Yes                    | Yes              | Yes                       | Netherlands    |
| O'Reilly 1999       | Yes                    | No             | Yes                  | No              | No            | Unclear        | Unclear                | Yes                    | Yes              | Yes                       | United Kingdom |
| Petrella 2000       | Yes                    | No             | Unclear              | No              | No            | Yes            | No                     | Yes                    | Yes              | Yes                       | United States  |
| Rapp 2009           | Unclear                | No             | Unclear              | No              | No            | Unclear        | Yes                    | Yes                    | Unclear          | Yes                       | Germany        |
| Rathi 2014          | Unclear                | No             | Unclear              | No              | No            | Unclear        | Yes                    | Yes                    | Yes              | Yes                       | India          |
| Rogers 2011         | Yes                    | No             | Unclear              | No              | No            | Unclear        | No                     | No                     | Yes              | Yes                       | United States  |
| Rogers 2012         | Yes                    | No             | Unclear              | No              | No            | Unclear        | Unclear                | No                     | Yes              | Yes                       | United States  |
| Rogind 1998         | Yes                    | No             | Unclear              | No              | No            | Yes            | Unclear                | Yes                    | Yes              | Unclear                   | Denmark        |
| Rooij 2016          | Yes                    | No             | Yes                  | No              | No            | Yes            | Yes                    | Yes                    | Yes              | Yes                       | Netherlands    |
| Rosedale 2014       | Yes                    | No             | Yes                  | No              | No            | No             | Yes                    | Yes                    | Yes              | Yes                       | Canada         |
| Salacinski 2012     | Yes                    | No             | Unclear              | No              | No            | Unclear        | No                     | No                     | No               | Yes                       | United States  |
| Salli 2010          | Unclear                | No             | Yes                  | No              | No            | Unclear        | No                     | No                     | Yes              | Yes                       | Turkey         |
| Samut 2015          | Unclear                | No             | Unclear              | No              | No            | Unclear        | No                     | Yes                    | Yes              | Yes                       | Turkey         |
| Sayers 2012         | Yes                    | No             | Unclear              | No              | No            | Yes            | Unclear                | Yes                    | Yes              | Yes                       | United States  |
| Schilke 1996        | Unclear                | No             | Unclear              | No              | No            | Unclear        | No                     | No                     | Unclear          | Yes                       | United States  |
| Sekir 2005          | Unclear                | No             | Unclear              | No              | No            | Unclear        | Yes                    | Yes                    | Unclear          | Yes                       | Turkey         |
| Simão 2012          | Unclear                | No             | Yes                  | No              | No            | Yes            | No                     | Yes                    | No               | Yes                       | Brazil         |
| Singh 2011 (female) | Unclear                | No             | Unclear              | No              | No            | Unclear        | Unclear                | Unclear                | Unclear          | Yes                       | Punjab         |
| Skoffer 2016        | Yes                    | No             | Yes                  | No              | No            | Yes            | Yes                    | Yes                    | Yes              | Yes                       | Denmark        |
| Sung-Bum 2015       | Unclear                | No             | Unclear              | No              | No            | Unclear        | Unclear                | Unclear                | Yes              | Yes                       | Korea          |
| Swank 2011          | Unclear                | No             | Unclear              | No              | No            | Unclear        | Yes                    | Yes                    | Yes              | Yes                       | United States  |
| Takacs 2017         | Yes                    | No             | Yes                  | No              | No            | Yes            | Yes                    | No                     | Yes              | Yes                       | Canada         |
| Teirlinck 2016      | Yes                    | Yes            | Yes                  | No              | No            | No             | Yes                    | Yes                    | Yes              | Yes                       | Netherlands    |
| Teixeira 2011       | Unclear                | No             | Yes                  | No              | No            | No             | No                     | No                     | Yes              | Yes                       | United States  |
| Thamalikitkul 2002  | Unclear                | Yes            | Unclear              | No              | No            | Unclear        | Unclear                | Unclear                | Yes              | Yes                       | Thailand       |
| Thorstensson 2005   | Yes                    | No             | Yes                  | No              | No            | Unclear        | Unclear                | Unclear                | Yes              | Yes                       | Sweden         |

| Study              | Adequate randomization | >100 per group | Concealed Allocation | Physician Blind | Patient Blind | Assessor Blind | Missing Outcome Assess | Intention-to-treat Use | Homogenous Group | Reported as Pre-specified | Country       |
|--------------------|------------------------|----------------|----------------------|-----------------|---------------|----------------|------------------------|------------------------|------------------|---------------------------|---------------|
| Topp 2002          | Unclear                | No             | Unclear              | No              | No            | Unclear        | Unclear                | Unclear                | Yes              | Yes                       | United States |
| Topp 2009          | Unclear                | No             | Unclear              | No              | No            | Unclear        | Unclear                | Unclear                | Yes              | Yes                       | United States |
| Tsauo 2008         | Yes                    | No             | Unclear              | No              | No            | Unclear        | No                     | No                     | Yes              | Yes                       | Taiwan        |
| Vaithianadane 2014 | Unclear                | No             | Unclear              | No              | No            | Unclear        | Unclear                | Unclear                | Unclear          | Yes                       | India         |
| Van Baar 1998      | Yes                    | Yes            | Yes                  | No              | No            | Yes            | Yes                    | Yes                    | Yes              | Yes                       | Netherland    |
| Wallis 2017        | Yes                    | No             | Yes                  | No              | No            | Yes            | Yes                    | Yes                    | Yes              | Yes                       | Australia     |
| Wang 2007          | Unclear                | No             | Unclear              | No              | No            | Unclear        | No                     | Yes                    | Yes              | Yes                       | Taiwan        |
| Wang 2011          | Yes                    | No             | Unclear              | No              | No            | Yes            | No                     | No                     | Yes              | Yes                       | Taiwan        |
| Weidenhielm 1993   | Yes                    | No             | Unclear              | No              | No            | Unclear        | Yes                    | Unclear                | Yes              | Yes                       | Sweden        |
| Weng 2009          | Yes                    | No             | Yes                  | No              | No            | Yes            | Unclear                | Yes                    | Yes              | Yes                       | Taiwan        |
| Wortley 2013       | Unclear                | No             | Unclear              | No              | No            | Unclear        | No                     | No                     | Unclear          | Yes                       | United States |

## Appendix 8: Sensitivity analysis

| Effect size (95% credible interval) |                           |                                   |                           |                            |
|-------------------------------------|---------------------------|-----------------------------------|---------------------------|----------------------------|
| <i>versus usual care</i>            |                           |                                   |                           |                            |
|                                     | Primary analysis          | Sensitivity analysis              |                           |                            |
|                                     |                           | Allocation concealment - low risk | SD not imputed            | Sample size $\geq 30$ /arm |
| <b>Pain</b>                         | <b>89 trials (n=7184)</b> | <b>41 trials (n=3975)</b>         | <b>86 trials (n=6666)</b> | <b>37 trials (n=5245)</b>  |
| Aerobic                             | 1.11 (0.69, 1.54)         | 0.43 (-0.39, 1.26)                | 1.12 (0.66, 1.57)         | 0.95 (0.43, 1.47)          |
| Mind-body                           | 1.11 (0.63, 1.59)         | 1.60 (0.95, 2.24)                 | 1.10 (0.61, 1.60)         | 1.21 (0.48, 1.94)          |
| Strength                            | 0.73 (0.49, 0.98)         | 0.50 (0.19, 0.80)                 | 0.74 (0.48, 1.00)         | 0.53 (0.24, 0.82)          |
| Flex/Skills                         | 0.65 (0.29, 1.00)         | 0.29 (-0.15, 0.73)                | 0.65 (0.29, 1.01)         | 0.35 (-0.12, 0.83)         |
| Mixed                               | 0.47 (0.26, 0.69)         | 0.40 (0.16, 0.64)                 | 0.46 (0.24, 0.69)         | 0.27 (0.01, 0.53)          |
| <b>Function</b>                     | <b>87 trials (n=7153)</b> | <b>42 trials (n=3951)</b>         | <b>85 trials (n=6843)</b> | <b>39 trials (n=5342)</b>  |
| Aerobic                             | 0.59 (0.10, 1.07)         | 0.22 (-0.52, 0.95)                | 0.59 (0.10, 1.08)         | 0.45 (-0.26, 1.15)         |
| Mind-body                           | 0.81 (0.27, 1.36)         | 1.04 (0.46, 1.6)                  | 0.81 (0.26, 1.37)         | 1.03 (0.13, 1.94)          |
| Strength                            | 0.76 (0.48, 1.03)         | 0.60 (0.34, 0.86)                 | 0.75 (0.46, 1.04)         | 0.65 (0.31, 1.00)          |
| Flex/Skills                         | 0.68 (0.28, 1.09)         | 0.25 (-0.10, 0.61)                | 0.66 (0.24, 1.08)         | 0.60 (0.08, 1.13)          |
| Mixed                               | 0.43 (0.18, 0.69)         | 0.30 (0.09, 0.51)                 | 0.44 (0.19, 0.70)         | 0.37 (0.05, 0.70)          |
| <b>Performance</b>                  | <b>95 trials (n=6760)</b> | <b>41 trials (n=3579)</b>         | <b>93 trials (n=6955)</b> | <b>38 trials (n=4911)</b>  |
| Aerobic                             | 1.05 (0.63, 1.48)         | 0.65 (-0.18, 1.49)                | 1.06 (0.63, 1.48)         | 0.95 (0.42, 1.49)          |
| Mind-body                           | 0.53 (0.01, 1.05)         | 0.66 (-0.15, 1.47)                | 0.53 (0.02, 1.05)         | 0.05 (-0.98, 1.08)         |
| Strength                            | 0.55 (0.32, 0.78)         | 0.44 (0.14, 0.74)                 | 0.53 (0.30, 0.76)         | 0.47 (0.17, 0.77)          |
| Flex/Skills                         | 0.68 (0.34, 1.03)         | 0.37 (-0.07, 0.82)                | 0.64 (0.29, 0.99)         | 0.47 (-0.01, 0.95)         |
| Mixed                               | 0.48 (0.27, 0.69)         | 0.36 (0.11, 0.60)                 | 0.50 (0.29, 0.71)         | 0.42 (0.15, 0.69)          |
| <b>Quality of life</b>              | <b>40 trials (n=3190)</b> | <b>26 trials (n=2486)</b>         | <b>NA</b>                 | <b>18 trials (n=2281)</b>  |
| Aerobic                             | 0.39 (-0.06, 0.83)        | 0.62 (-0.16, 1.42)                | -                         | 0.20 (-0.32, 0.73)         |
| Mind-body                           | 0.24 (-0.09, 0.58)        | 0.42 (-0.11, 0.96)                | -                         | 0.00 (-0.40, 0.41)         |
| Strength                            | 0.26 (0.05, 0.47)         | 0.20 (-0.05, 0.45)                | -                         | 0.11 (-0.09, 0.30)         |
| Flex/Skills                         | 0.33 (-0.03, 0.68)        | 0.19 (-0.23, 0.56)                | -                         | 0.34 (0.04, 0.63)          |
| Mixed                               | 0.19 (0.04, 0.35)         | 0.12 (-0.06, 0.31)                | -                         | 0.14 (0.01, 0.27)          |

Sensitivity analysis performed to show if some underlying assumptions (i.e. high risk of allocation concealment, imputed standard deviation (SD), sample size  $< 30$ /arm) would significantly alter the conclusion of primary analysis.
